# Supplementary material for: Sonographic and 3T-MRI-based evaluation of the tongue in ALS
Source: PubMed Central journal article supplement — Neuroimage Clin. 2020 Mar 2;26:102233. doi: 10.1016/j.nicl.2020.102233 (PMC7068685; doi:10.1016/j.nicl.2020.102233), 2020-03-02
Supplement: mmc1.pdf [file mmc1.pdf]

## **Sonographic and 3T-MRI-based evaluation of the tongue in ALS**

Nathalie Hensiek<sup>1</sup>, Frank Schreiber<sup>1,2</sup>, Thomas Wimmer<sup>1</sup>, Jörn Kaufmann<sup>1</sup>, Judith Machts<sup>1,2</sup>, Laura Fahlbusch<sup>1</sup>, Cornelia Garz<sup>1,2</sup>, Susanne Vogt<sup>1,2</sup>, Johannes Prudlo<sup>3,4</sup>, Reinhard Dengler<sup>5</sup>, Susanne Petri<sup>5</sup>, Peter J Nestor<sup>6</sup>, Stefan Vielhaber<sup>1,2,7\*</sup>, Stefanie Schreiber<sup>1,2,7\*</sup>

<sup>1</sup> Department of Neurology, Otto-von-Guericke University, Magdeburg, Germany

<sup>2</sup> German Center for Neurodegenerative Diseases (DZNE) within the Helmholtz Association, Magdeburg, Germany

<sup>3</sup> Department of Neurology, Rostock University Medical Center, Germany

<sup>4</sup> German Center for Neurodegenerative Diseases (DNZE) within the Helmholtz Association, Rostock, Germany

<sup>5</sup> Department of Neurology, Hannover Medical School, Hannover, Germany

<sup>6</sup> Queensland Brain Institute, University of Queensland, Brisbane 4072, Australia

<sup>7</sup> Center for behavioral brain sciences (CBBS), Magdeburg

\* equally contributed

## **Supplemental Material**

**Supplemental Table 1. Correlations of the tongue variables with the demographics of the sample under consideration**

| Sonography |                      | Age        |              | Height      |              | Weight     |              | Sex            |                |
|------------|----------------------|------------|--------------|-------------|--------------|------------|--------------|----------------|----------------|
|            |                      | <i>r</i>   | <i>p</i>     | <i>r</i>    | <i>p</i>     | <i>r</i>   | <i>p</i>     | <i>t/Z</i>     | <i>p</i>       |
| Sonography | Intensity            | -0.1       | 0.5          | <b>-0.4</b> | <b>0.001</b> | -0.2       | 0.2          | <b>4.0**</b>   | <b>≤ 0.001</b> |
|            | Area                 | < 0.1      | 1.0          | 0.2         | 0.1          | <b>0.3</b> | <b>0.007</b> | -0.9**         | 0.4            |
|            | Height               | 0.1        | 0.7          | 0.2         | 0.2          | <b>0.3</b> | <b>0.03</b>  | -0.7**         | 0.5            |
|            | Width                | -0.1       | 0.4          | 0.2         | 0.2          | <b>0.3</b> | <b>0.007</b> | -1.0**         | 0.4            |
|            | Ratio height / width | 0.2        | 0.1          | < 0.1       | 0.8          | < 0.1      | 0.9          | < 0.1**        | 1.0            |
|            | MRI                  | Intensity  | <-0.1        | 0.8         | -0.1         | 0.3        | -0.9         | 0.3            | -0.7***        |
|            | Area                 | <-0.1      | 0.5          | 0.2         | 0.1          | <b>0.3</b> | <b>0.001</b> | <b>-3.3***</b> | <b>0.001</b>   |
|            | Position             | <-0.1      | 0.6          | -0.3        | 0.7          | -0.1       | 0.4          | 0.2**          | 0.9            |
|            | Shape                | <b>0.2</b> | <b>0.012</b> | 0.1         | 0.1          | < 0.1      | 0.8          | -1.7***        | 0.1            |

Correlation coefficient *r*, *t*-values\*\*, *Z*-values\*\*\* and *p*-values of correlation analyses are given. Significant correlations are highlighted in grey. MRI, magnetic resonance imaging. *P*-values < 0.05 were deemed to be statistically significant.

**Supplemental Table 2. Group and subgroup comparisons with respect to various sonographic and MRI tongue measures**

|                         |              | Sonography     |                         |             |             |                    | MRI              |                         |            |            |
|-------------------------|--------------|----------------|-------------------------|-------------|-------------|--------------------|------------------|-------------------------|------------|------------|
|                         |              | Echo-intensity | Area (cm <sup>2</sup> ) | Height (cm) | Width (cm)  | Ratio height/width | Intensity        | Area (cm <sup>2</sup> ) | Position   | Shape      |
| 1. ALS vs. CON          | ALS          | 43.0 [7.0]     | 6.80 [1.28]             | 2.60 [0.30] | 3.02 [0.30] | 0.9 [0.1]          | 60.4 [25.6]      | 24.3 [3.9]              | 0.6 [0.04] | 0.7 [0.1]  |
|                         | CON          | 45.3 [7.9]     | 6.21 [1.62]             | 2.41 [0.43] | 3.00 [0.30] | 0.8 [0.1]          | 57.0 [18.2]      | 23.8 [3.1]              | 0.6 [0.04] | 0.7 [0.1]  |
|                         |              | p = 0.3        | p = 0.1                 | p = 0.02    | p = 0.5     | p = 0.02           | p = 0.3          | p = 0.03                | p = 0.9    | p = 0.8    |
| 2. onset site           | limb         | 43.3 [7.5]     | 6.83 [1.38]             | 2.62 [0.34] | 3.02 [0.32] | 0.9 [0.1]          | 65.3 [25.6]      | 24.5 [3.8]              | 0.6 [0.04] | 0.7 [0.1]  |
|                         | bulbar       | 41.8 [5.0]     | 6.68 [0.87]             | 2.55 [0.22] | 3.02 [0.26] | 0.9 [0.1]          | 50.4 [23.0]      | 23.4 [4.0]              | 0.6 [0.04] | 0.7 [0.1]  |
|                         | CON          | 45.3 [7.9]     | 6.21 [1.62]             | 2.41 [0.43] | 3.00 [0.30] | 0.8 [0.1]          | 57.0 [18.2]      | 23.8 [3.1]              | 0.6 [0.04] | 0.7 [0.1]  |
|                         |              | p = 0.2        | p = 0.1                 | p = 0.1     | p = 0.7     | p = 0.1            | <b>p ≤ 0.001</b> | p = 0.1                 | p = 0.5    | p = 0.9    |
| 3. assisted ventilation | required     | 42.0 [4.9]     | 6.52 [1.22]             | 2.47 [0.26] | 3.02 [0.29] | 0.8 [0.1]          | 62.1 [26.5]      | 24.9 [2.2]              | 0.6 [0.04] | 0.7 [0.1]  |
|                         | not required | 43.0 [7.6]     | 6.94 [1.33]             | 2.65 [0.32] | 3.03 [0.32] | 0.9 [0.1]          | 60.9 [27.1]      | 24.2 [3.9]              | 0.6 [0.04] | 0.7 [0.1]  |
|                         |              | p = 0.6        | p = 0.1                 | p = 0.1     | p = 0.4     | p = 0.2            | p = 0.3          | p = 1.0                 | p = 0.7    | p = 0.3    |
| 4. gastrostomy          | with         | 40.6 [5.5]     | 6.26 [1.34]             | 2.49 [0.29] | 2.86 [0.32] | 0.9 [0.1]          | 44.1 [22.0]      | 23.8 [4.4]              | 0.6 [0.05] | 0.7 [0.05] |
|                         | without      | 43.3 [7.2]     | 6.88 [1.27]             | 2.62 [0.30] | 3.05 [0.30] | 0.9 [0.1]          | 61.6 [26.7]      | 24.3 [3.7]              | 0.6 [0.04] | 0.7 [0.08] |
|                         |              | p = 0.4        | p = 0.5                 | p = 0.6     | p = 0.4     | p = 0.6            | p = 0.2          | p = 0.4                 | p = 0.4    | p = 0.9    |

Unless otherwise reported mean [SD] is given. For group and subgroup analyses ANOVA was conducted and adjustment for demographic data was performed, if appropriate (see Results). In detail, tongue variable [covariate adjustment]: echointensity [height, sex]; sonographic area [weight]; height [weight]; width [weight]; ratio height/width [none]; MRI intensity [none]; MRI area [weight, sex]; position [none]; shape [age]. ALS, amyotrophic lateral sclerosis; CON, controls; MRI, magnetic resonance imaging. Bonferroni-adjusted p-values of < 0.013 were deemed to be statistically significant.

**Supplemental Table 3. Time interaction effects of tongue measures using mixed effects linear models**

| Sonography         | ALSFRS-R total |               |                | ALSFRS-R bulbar |               |                |              |
|--------------------|----------------|---------------|----------------|-----------------|---------------|----------------|--------------|
|                    | <i>e</i>       | CI            | <i>p</i>       | <i>e</i>        | CI            | <i>p</i>       |              |
| Intensity          | -0.01          | (-0.26; 0.08) | 0.3            | <b>0.03</b>     | (-0.02; 0.08) | <b>0.2</b>     |              |
| Area               | <b>0.5</b>     | (0.3; 0.6)    | □ <b>0.001</b> | <b>0.2</b>      | (0.1; 0.2)    | □ <b>0.001</b> |              |
| Height             | <b>0.3</b>     | (0.1; 0.4)    | <b>0.002</b>   | <b>0.1</b>      | (0.1; 0.2)    | □ <b>0.001</b> |              |
| Width              | <b>0.5</b>     | (0.3; 0.6)    | □ <b>0.001</b> | <b>0.2</b>      | (0.1; 0.2)    | □ <b>0.001</b> |              |
| Ratio height/width | 0.2            | (0.004; 0.4)  | 0.05           | 0.05            | (0.004; 0.1)  | 0.07           |              |
| MRI                | Intensity      | 0.06          | (-0.03; 0.2)   | 0.2             | 0.002         | (-0.03; 0.03)  | 0.9          |
|                    | Area           | 0.04          | (-0.06; 0.1)   | 0.4             | <b>0.05</b>   | (0.01; 0.08)   | <b>0.004</b> |
|                    | Position       | 0.07          | (-0.02; 0.2)   | 0.1             | 0.002         | (-0.03; 0.03)  | 0.9          |
|                    | Shape          | <b>0.1</b>    | (0.02; 0.2)    | <b>0.015</b>    | 0.02          | (-0.01; 0.1)   | 0.2          |

P-values and estimates *e* of time interaction effects are given. Significant values are highlighted in grey. ALSFRS-R, revised ALS functional rating scale; MRI, magnetic resonance imaging; Bonferroni-adjusted p-values of < 0.025 were deemed to be statistically significant.

**Supplemental Table 4. Influence of studied sonographic parameters as additional inclusion parameters on power and sample size of a hypothetical study**

|                       | Whole sonographic ALS cohort | submedian sonographic tongue area | submedian sonographic tongue height | subgroup submedian sonographic tongue width |
|-----------------------|------------------------------|-----------------------------------|-------------------------------------|---------------------------------------------|
| n per arm at P = 80 % | 34                           | 29                                | 32                                  | 26                                          |
| Power at n = 34       | 80 %                         | 87 %                              | 83 %                                | 90 %                                        |

Calculation of the necessary sample size or obtainable power based on the characteristics of the whole sonographic cohort and, for comparison, those parameters for subcohorts selected to additionally show submedian sonographic tongue area, tongue height or tongue width.

Sample size calculations for a hypothetical, randomized, controlled trial with a 12-month observation period were conducted using a 2-sample t-test, assuming equal group means, a 50% treatment effect on ALSFRS-R decline, a linear ALSFRS-R decline, a 2-sided significance of 0.05, and a power of 0.8. Analysis was performed using nQuery winter 2019 release (ver 8.5.0) software (Statistical Solutions Ltd, Cork, Ireland).

**Supplemental Table 5. Influence of studied MRI parameters as additional inclusion parameters on power and sample size of a hypothetical study**

|                         | Whole MRI ALS cohort | subgroup submedian MRI-based tongue area | subgroup submedian MRI-based tongue shape |
|-------------------------|----------------------|------------------------------------------|-------------------------------------------|
| n per group at P = 80 % | 44                   | 41                                       | 40                                        |
| Power at n = 44         | 80 %                 | 84 %                                     | 84                                        |

Calculation of the necessary sample size or obtainable power based on the characteristics of the whole MRI cohort and, for comparison, those parameters for subcohorts selected to additionally show submedian MRI-based tongue area or tongue shape parameter.

Sample size calculations for a hypothetical, randomized, controlled trial with a 12-month observation period were conducted using a 2-sample t-test, assuming equal group means, a 50% treatment effect on ALSFRS-R decline, a linear ALSFRS-R decline, a 2-sided significance of 0.05, and a power of 0.8. Analysis was performed using nQuery winter 2019 release (ver 8.5.0) software (Statistical Solutions Ltd, Cork, Ireland).
